# Supplementary material for: Network of Interactions between ZIKA Virus Non-structural Proteins and Human Host Proteins
Source: Preprints.org preprint supplement (doi:10.20944/preprints201909.0078.v1), 2019-09-07
Supplement: Supplementary file 1 [file supplementary]

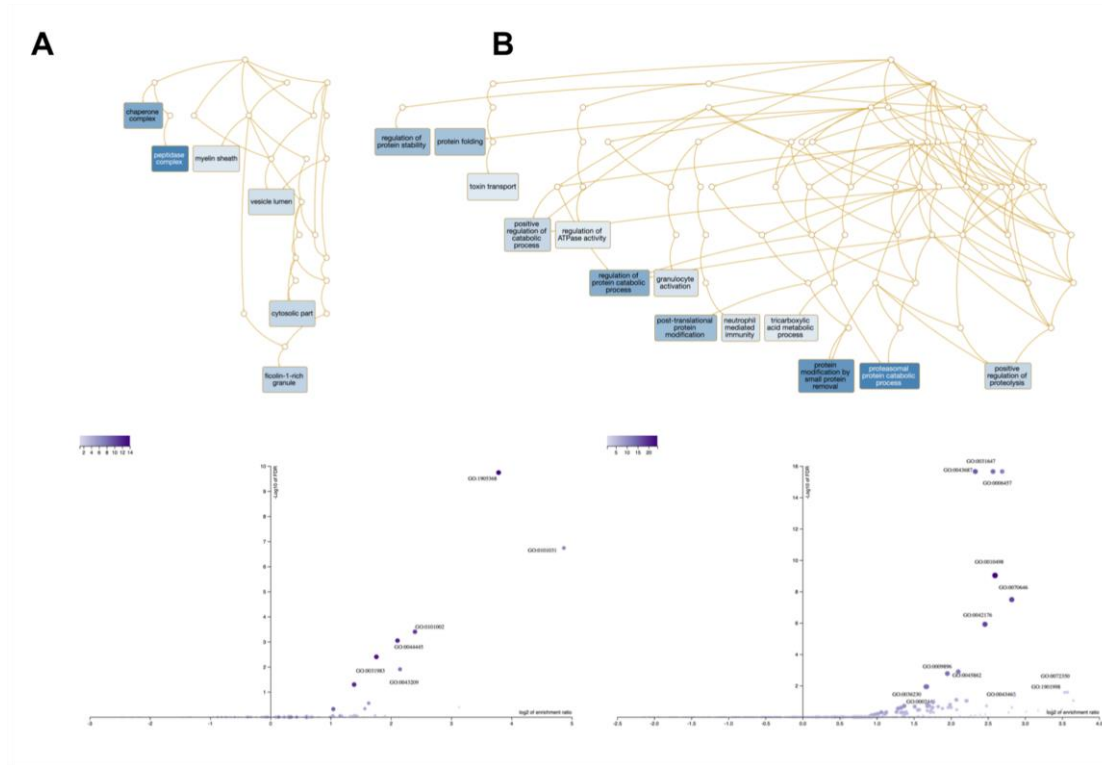

**Figure S1: GO enrichment of the merged network.** Hierarchical directed acyclic graph (DAG) and volcano plot of GO enrichment for cellular component (A) and biological process (B) generated by the online WebGestalt program with the parameters specified in Table S5 and S6.

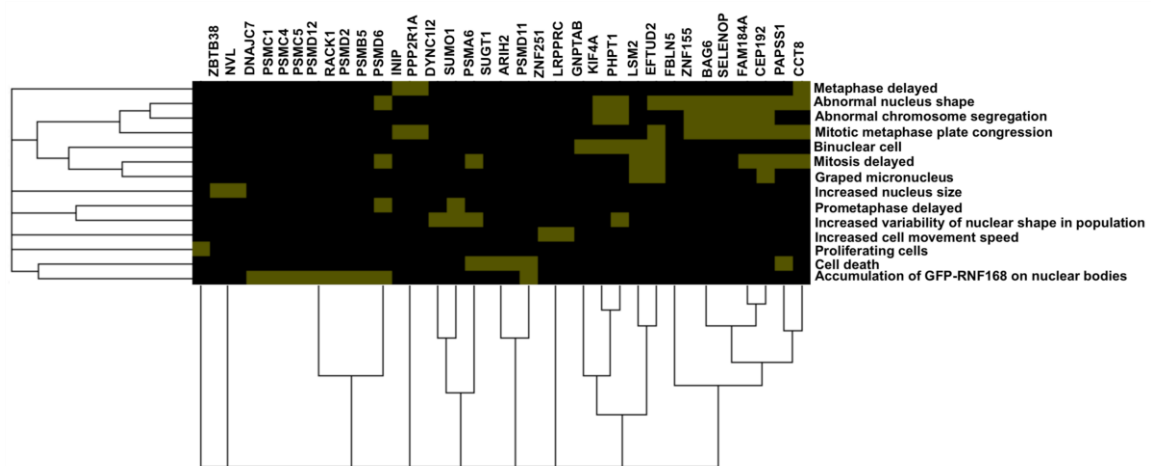

**Figure S2: Phenoclusters of individual preys.** Clustering of individual preys according to enrichment or depletion of Mitocheck phenotype classes. Clustering and visualizations analysis were performed using Cluster v3.0 software and TreeView v1.1.6r4, respectively.

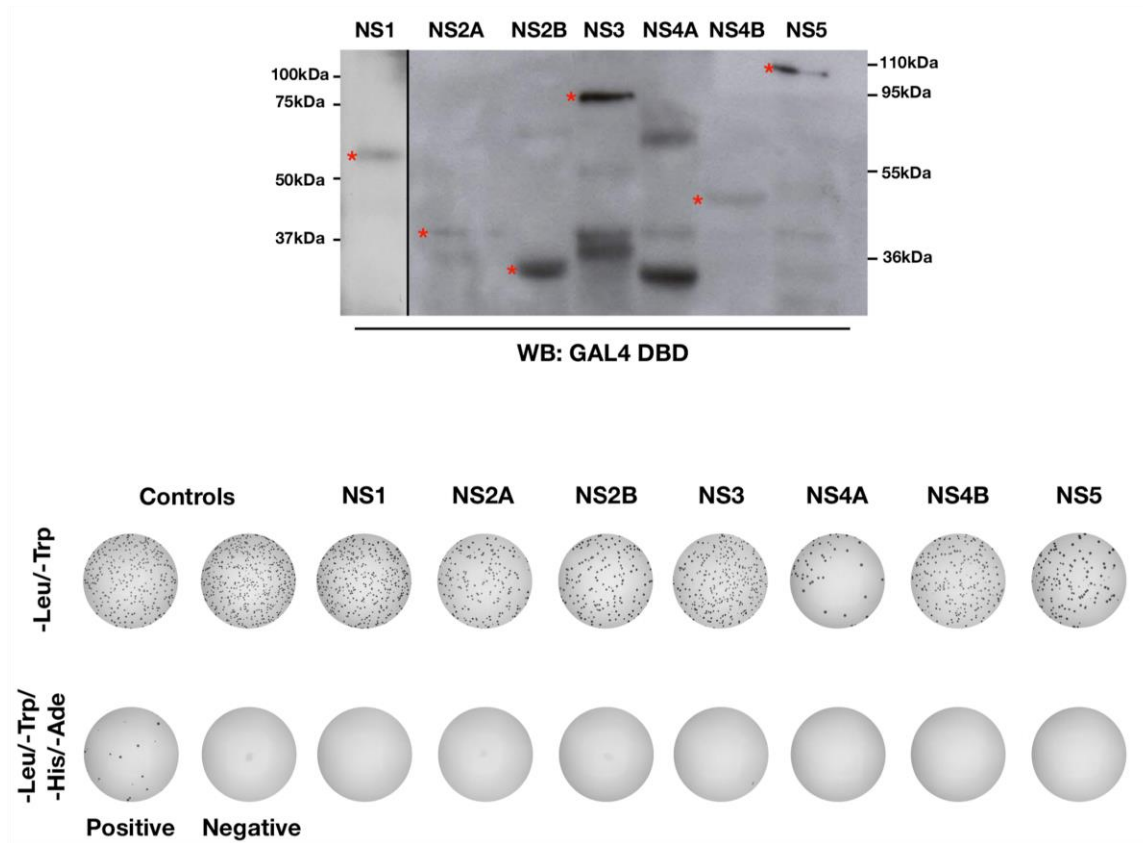

**Figure S3: Y2H bait expression, control transformations and matings. A.** Western blot using an antibody recognizing the GAL4 DBD to detect the fusion proteins in yeast. **B.** Control plates are shown for yeast transformed with a vector expressing GAL4 DBD-tagged NS proteins (or empty vector control) and pGADT7 empty vector (expressing the GAL4 activation domain). The upper set of plates lack Trp and Leu The lower set of plates lack Trp, Leu, His, and Ade.
