# Supplementary material for: Network of Interactions between ZIKA Virus Non-structural Proteins and Human Host Proteins
Source: Preprints.org preprint supplement (doi:10.20944/preprints201909.0078.v1), 2019-09-07
Supplement: Supplementary file 1 [file Supplementary Tables ZIKV (Monteiro).xlsx]

## Sheet: STable 1
Bait	Mating efficiency (%)	Coverageb	Positive clones	Sequenced	In-frame clones	Unique hitsc	Validation (clones tested)	Validation (%)	Confirmed	False positive (%)
NS1	24	44300000	322	153	114	19	7	36.8	7	0
NS2A	4	6740000	13	13	2	1	1	100	1	0
NS2B	5	10800000	28	25	18	12	6	50	3	50
NS3	7	1800000	311	168	83	56	7	12.5	6	14.3
NS4A	8	20900000	49	44	23	6	6	100	6	0
NS4B	11	48000000	46	45	45	3	3	100	2	33.3
NS5a	4; 14	4200000	58	53	24	12	8	66.7	4	50
Total			827	501	309	99	38	38.4	29	23.7

## Sheet: STable 2
Bait	Prey	Independent clones	Validated
NS1	FBLN5	4	Not tested
NS1	LSM2	1	Not tested
NS1	MANBA	1	Not tested
NS1	NNT	1	Not tested
NS1	PHPT1	1	Not tested
NS1	RIDA	1	Not tested
NS1	RMND5A	1	Not tested
NS1	SEC24D	1	Not tested
NS1	SELENOP	1	Not tested
NS1	TCTEX1D2	1	Not tested
NS1	TIMP4	1	Not tested
NS1	WDR47	1	Not tested
NS1	ARIH2	1	Yes
NS1	COPS5	5	Yes
NS1	DNAJC19	3	Yes
NS1	EFTUD2	1	Yes
NS1	RACK1	1	Yes
NS1	SNAPIN	83	Yes
NS1	ZNF350	2	Yes
NS2A	CAMLG	2	Yes
NS2B	CYP39A1	3	No
NS2B	SLC39A6	4	No
NS2B	WAC	1	No
NS2B	ERBIN	1	Not tested
NS2B	INIP	1	Not tested
NS2B	NKIRAS1	1	Not tested
NS2B	PHTF1	2	Not tested
NS2B	RNF10	1	Not tested
NS2B	SLC30A9	1	Not tested
NS2B	NCAM2	1	Yes
NS2B	RAD50	1	Yes
NS2B	RTN1	1	Yes
NS3	LGALS8	1	No
NS3	ASPA	1	Not tested
NS3	ASXL1	1	Not tested
NS3	ATP1B3	1	Not tested
NS3	BAZ2B	1	Not tested
NS3	BCAT1	1	Not tested
NS3	BRD2	1	Not tested
NS3	CA2	1	Not tested
NS3	CEP192	1	Not tested
NS3	CNRIP1	2	Not tested
NS3	COL5A2	2	Not tested
NS3	COPB1	1	Not tested
NS3	CTSV	1	Not tested
NS3	DCN	1	Not tested
NS3	DCTN6	2	Not tested
NS3	DYNC1I2	1	Not tested
NS3	FBLN5	1	Not tested
NS3	FIP1L1	1	Not tested
NS3	GAB1	1	Not tested
NS3	GNPTAB	2	Not tested
NS3	IL1RAP	1	Not tested
NS3	MAP1B	1	Not tested
NS3	ME2	1	Not tested
NS3	MPP1	1	Not tested
NS3	NUDCD1	1	Not tested
NS3	OLFM1	1	Not tested
NS3	OSBPL1A	1	Not tested
NS3	PAPSS1	1	Not tested
NS3	PDE4DIP	1	Not tested
NS3	PDHB	1	Not tested
NS3	PGM1	1	Not tested
NS3	POGZ	1	Not tested
NS3	POLR1C	1	Not tested
NS3	PON2	1	Not tested
NS3	QRICH1	1	Not tested
NS3	RELN	1	Not tested
NS3	SDHB	1	Not tested
NS3	SGIP1	1	Not tested
NS3	SNX6	1	Not tested
NS3	SUMO1	1	Not tested
NS3	TLE2	1	Not tested
NS3	ZBTB38	3	Not tested
NS3	ZNF155	1	Not tested
NS3	ZNF225	1	Not tested
NS3	ZNF23	4	Not tested
NS3	ZNF251	1	Not tested
NS3	ZNF350	11	Not tested
NS3	ZNF577	1	Not tested
NS3	ZNF582	1	Not tested
NS3	ZSCAN9	1	Not tested
NS3	AHCYL1	2	Yes
NS3	ATP1B1	2	Yes
NS3	DDX5	1	Yes
NS3	N4BP2L2	1	Yes
NS3	RACK1	2	Yes
NS3	SIAH2	1	Yes
NS4A	CNTN3	1	Yes
NS4A	EPHA4	2	Yes
NS4A	ERMN	2	Yes
NS4A	NCAM2	1	Yes
NS4A	OMG	16	Yes
NS4A	RTN1	1	Yes
NS4B	SNAPIN	34	No
NS4B	BCLAF1	3	Yes
NS4B	COPS5	7	Yes
NS5	GYG1	1	No
NS5	PPWD1	1	No
NS5	ZKSCAN4	2	No
NS5	FAM184A	5	Not tested
NS5	KRT222	1	Not tested
NS5	PIAS1	1	Not tested
NS5	VIM	8	No
NS5	ZMYM5	1	Not tested
NS5	ATP1B1	1	Yes
NS5	COPS5	1	Yes
NS5	DCAF6	1	Yes
NS5	N4BP2L2	1	Yes

## Sheet: STable 3
Prey	PreyGene	Bait	Spec	SpecSum	AvgSpec	NumReplicates	ctrlCounts	AvgP	MaxP	TopoAvgP	TopoMaxP	SaintScore	logOddsScore	log2(FoldChange)	BFDR	boosted_by	Length	NumExp	TotalExp	CrapomePCT	ln(NSAF)	ctrl_number	NSAF Score
2AAA_HUMAN	PPP2R1A	NS1	12|2|1|9	24	6	4	0|0|2|0|0|0|1|0	0.63	1	0.63	1	0.63	-1.19	4	0.25	NA	589	132	411	67.88	-6.3193	8	4.96894e-06
BAG2_HUMAN	BAG2	NS1	8|3|3|7	21	5.25	4	0|0|2|3|0|0|2|2	0.6	0.98	0.6	0.98	0.6	-1.2	2.22	0.28	NA	211	96	411	76.64	-5.42627	8	1.18361e-05
CCDC6_HUMAN	CCDC6	NS1	12|0|0|7	19	4.75	4	0|0|0|0|0|0|0|0	0.5	1	0.5	1	0.5	-1.95	5.57	0.4	NA	474	6	411	98.54	-6.3357	8	4.938e-06
CHIP_HUMAN	STUB1	NS1	7|1|2|6	16	4	4	0|0|2|2|0|0|0|0	0.59	0.99	0.59	0.99	0.59	-1.55	3	0.29	NA	303	62	411	84.91	-6.06008	8	6.37369e-06
DNJC7_HUMAN	DNAJC7	NS1	1|8|7|12	28	7	4	0|1|0|1|0|0|2|0	0.75	1	0.75	1	0.75	-1.83	3.81	0.12	NA	494	59	411	85.64	-5.98926	8	6.90184e-06
IRS4_HUMAN	IRS4	NS1	24|7|3|23	57	14.25	4	1|1|11|1|0|2|5|5	0.5	0.98	0.5	0.98	0.5	-8.05	2.13	0.45	NA	1257	152	411	63.02	-6.21236	8	5.38033e-06
PSD11_HUMAN	PSMD11	NS1	5|0|0|7	12	3	4	0|0|0|0|0|0|1|0	0.5	1	0.5	1	0.5	-2.04	4.58	0.43	NA	422	97	411	76.4	-6.67903	8	3.47945e-06
PSMD2_HUMAN	PSMD2	NS1	11|0|0|8	19	4.75	4	0|0|3|1|0|0|1|1	0.5	1	0.5	1	0.5	-4.33	2.66	0.46	NA	908	124	411	69.83	-6.98574	8	2.512e-06
PSMD3_HUMAN	PSMD3	NS1	6|1|0|6	13	3.25	4	0|0|0|1|0|0|0|0	0.5	1	0.5	1	0.5	-2.04	4.7	0.42	NA	534	111	411	72.99	-6.83438	8	2.98037e-06
TCPB_HUMAN	CCT2	NS1	24|5|3|22	54	13.5	4	0|0|2|4|0|1|1|6	0.59	1	0.59	1	0.59	-2.93	2.95	0.3	NA	535	180	411	56.2	-5.41221	8	1.21737e-05
TCPE_HUMAN	CCT5	NS1	19|3|3|18	43	10.75	4	0|0|4|3|0|0|4|6	0.5	0.99	0.5	0.99	0.5	-4.2	2.34	0.35	NA	541	182	411	55.72	-5.65115	8	9.47869e-06
TCPH_HUMAN	CCT7	NS1	14|4|5|24	47	11.75	4	0|0|4|4|0|1|5|5	0.51	1	0.51	1	0.51	-3.84	2.31	0.34	NA	543	172	411	58.15	-5.56589	8	1.03146e-05
TCPQ_HUMAN	CCT8	NS1	26|8|8|29	71	17.75	4	0|0|7|5|1|4|5|6	0.53	1	0.53	1	0.53	-2.85	2.34	0.32	NA	548	183	411	55.47	-5.16253	8	1.54522e-05
BAG6_HUMAN	BAG6	NS2A	0|1|12|11	24	6	4	0|0|0|0|0|0|0|0	0.5	1	0.5	1	0.5	-1.95	5.91	0.38	NA	1132	44	411	89.29	-6.71242	8	3.38802e-06
CCDC6_HUMAN	CCDC6	NS2A	0|0|14|11	25	6.25	4	0|0|0|0|0|0|0|0	0.5	1	0.5	1	0.5	-1.95	5.97	0.38	NA	474	6	411	98.54	-5.80106	8	8.42833e-06
DDX21_HUMAN	DDX21	NS2A	1|2|6|7	16	4	4	0|0|2|1|1|2|1|1	0.51	0.98	0.51	0.98	0.51	-3.58	2	0.35	NA	783	179	411	56.45	-6.74927	8	3.16374e-06
DNJC7_HUMAN	DNAJC7	NS2A	2|1|11|7	21	5.25	4	0|1|0|1|0|0|2|0	0.6	1	0.6	1	0.6	-1.83	3.39	0.29	NA	494	59	411	85.64	-6.01674	8	6.71258e-06
GET4_HUMAN	GET4	NS2A	0|0|6|6	12	3	4	0|0|0|0|0|0|0|0	0.5	1	0.5	1	0.5	-1.95	4.91	0.42	NA	327	11	411	97.32	-6.16378	8	5.86427e-06
H4_HUMAN	HIST1H4A	NS2A	5|5|4|4	18	4.5	4	0|0|2|2|0|0|1|2	0.82	0.91	0.82	0.91	0.82	0.94	2.36	0.06	NA	103	225	411	45.26	-4.60309	8	2.72498e-05
IPO5_HUMAN	IPO5	NS2A	0|0|9|9	18	4.5	4	0|0|0|0|0|0|0|0	0.5	1	0.5	1	0.5	-1.95	5.49	0.39	NA	1097	80	411	80.54	-6.96869	8	2.62209e-06
LPPRC_HUMAN	LRPPRC	NS2A	0|0|15|13	28	7	4	0|0|3|2|0|0|4|2	0.5	1	0.5	1	0.5	-6.51	2.35	0.45	NA	1394	130	411	68.37	-6.76646	8	3.13125e-06
PPME1_HUMAN	PPME1	NS2A	0|0|5|3	8	2	4	0|0|0|0|0|0|0|0	0.5	1	0.5	1	0.5	-1.95	4.32	0.46	NA	386	15	411	96.35	-6.73512	8	3.31195e-06
PRS4_HUMAN	PSMC1	NS2A	0|0|5|3	8	2	4	0|0|0|0|0|0|0|0	0.5	1	0.5	1	0.5	-1.95	4.32	0.46	NA	440	95	411	76.89	-6.86606	8	2.90548e-06
PRS6B_HUMAN	PSMC4	NS2A	0|0|4|6	10	2.5	4	0|0|0|0|0|0|0|0	0.5	1	0.5	1	0.5	-1.95	4.64	0.44	NA	418	97	411	76.4	-6.59162	8	3.823e-06
PRS7_HUMAN	PSMC2	NS2A	0|0|14|11	25	6.25	4	0|0|1|0|0|0|0|0	0.5	1	0.5	1	0.5	-2.04	5.64	0.39	NA	433	126	411	69.34	-5.71059	8	9.2034e-06
PRS8_HUMAN	PSMC5	NS2A	0|0|15|8	23	5.75	4	0|0|0|0|0|0|1|2	0.5	1	0.5	1	0.5	-2.97	3.94	0.44	NA	406	116	411	71.78	-5.72959	8	8.97923e-06
PSA6_HUMAN	PSMA6	NS2A	0|0|5|5	10	2.5	4	0|0|0|0|0|0|0|0	0.5	1	0.5	1	0.5	-1.95	4.64	0.43	NA	246	86	411	79.08	-6.06147	8	6.49598e-06
PSB5_HUMAN	PSMB5	NS2A	0|0|4|4	8	2	4	0|0|0|0|0|0|1|0	0.5	1	0.5	1	0.5	-2.04	4	0.46	NA	263	92	411	77.62	-6.35144	8	4.82304e-06
PSD11_HUMAN	PSMD11	NS2A	0|0|9|6	15	3.75	4	0|0|0|0|0|0|1|0	0.5	1	0.5	1	0.5	-2.04	4.91	0.42	NA	422	97	411	76.4	-6.19568	8	5.65656e-06
PSD12_HUMAN	PSMD12	NS2A	0|0|7|5	12	3	4	0|0|0|0|0|0|1|1	0.5	1	0.5	1	0.5	-2.49	3.58	0.45	NA	456	97	411	76.4	-6.49631	8	4.16165e-06
PSD13_HUMAN	PSMD13	NS2A	0|1|5|4	10	2.5	4	0|0|0|0|0|0|0|0	0.5	1	0.5	1	0.5	-1.95	4.64	0.44	NA	376	79	411	80.78	-6.48573	8	4.25004e-06
PSMD2_HUMAN	PSMD2	NS2A	2|2|18|12	34	8.5	4	0|0|3|1|0|0|1|1	0.62	1	0.62	1	0.62	-1.2	3.5	0.26	NA	908	124	411	69.83	-6.14361	8	5.91798e-06
PSMD3_HUMAN	PSMD3	NS2A	1|0|11|8	20	5	4	0|0|0|1|0|0|0|0	0.5	1	0.5	1	0.5	-2.04	5.32	0.4	NA	534	111	411	72.99	-6.14339	8	5.96643e-06
PSMD4_HUMAN	PSMD4	NS2A	0|0|5|6	11	2.75	4	0|0|0|0|0|0|0|0	0.5	1	0.5	1	0.5	-1.95	4.78	0.43	NA	377	73	411	82.24	-6.39308	8	4.66264e-06
PSMD6_HUMAN	PSMD6	NS2A	0|0|11|8	19	4.75	4	0|0|1|0|0|0|0|0	0.5	1	0.5	1	0.5	-2.04	5.25	0.4	NA	389	82	411	80.05	-5.87787	8	7.77961e-06
RAB18_HUMAN	RAB18	NS2A	0|0|4|3	7	1.75	4	0|0|0|0|0|0|0|0	0.5	1	0.5	1	0.5	-1.95	4.13	0.46	NA	206	12	411	97.08	-6.24069	8	5.43014e-06
RPN1_HUMAN	RPN1	NS2A	0|0|9|9	18	4.5	4	0|0|2|0|0|0|2|2	0.5	1	0.5	1	0.5	-4.33	2.58	0.45	NA	607	91	411	77.86	-6.37689	8	4.64038e-06
TERA_HUMAN	VCP	NS2A	1|0|15|12	28	7	4	0|0|0|0|0|0|2|1	0.5	1	0.5	1	0.5	-2.97	4.22	0.41	NA	806	167	411	59.37	-6.21861	8	5.51437e-06
UBL4A_HUMAN	UBL4A	NS2A	1|0|7|4	12	3	4	0|0|0|0|0|0|0|0	0.5	1	0.5	1	0.5	-1.95	4.91	0.44	NA	157	19	411	95.38	-5.43007	8	1.22141e-05
VTA1_HUMAN	VTA1	NS2A	0|0|4|4	8	2	4	0|0|0|0|0|0|0|0	0.5	1	0.5	1	0.5	-1.95	4.32	0.45	NA	307	9	411	97.81	-6.50613	8	4.16421e-06
AHNK_HUMAN	AHNAK	NS2B	0|1|62|81	144	36	4	0|0|2|3|0|0|1|2	0.5	1	0.5	1	0.5	-4.91	5.17	0.36	NA	5890	62	411	84.91	-6.34363	8	4.88546e-06
CCDC6_HUMAN	CCDC6	NS2B	4|4|17|15	40	10	4	0|0|0|0|0|0|0|0	1	1	1	1	1	6.18	6.64	0	NA	474	6	411	98.54	-5.10476	8	1.69098e-05
DDX21_HUMAN	DDX21	NS2B	2|0|8|6	16	4	4	0|0|2|1|1|2|1|1	0.51	0.99	0.51	0.99	0.51	-4.98	2	0.35	NA	783	179	411	56.45	-6.52298	8	3.99297e-06
EF1D_HUMAN	EEF1D	NS2B	2|4|14|12	32	8	4	1|1|5|4|1|2|5|4	0.5	1	0.5	1	0.5	-8.8	1.48	0.45	NA	281	157	411	61.8	-4.80505	8	2.20045e-05
KIF4A_HUMAN	KIF4A	NS2B	0|0|17|11	28	7	4	1|1|0|0|0|0|0|0	0.5	1	0.5	1	0.5	-2.49	4.81	0.39	NA	1232	35	411	91.48	-6.41662	8	4.53798e-06
NEDD1_HUMAN	NEDD1	NS2B	0|0|4|5	9	2.25	4	0|0|0|0|0|0|0|0	0.5	1	0.5	1	0.5	-1.95	4.49	0.44	NA	660	8	411	98.05	-6.92745	8	2.73248e-06
STIM1_HUMAN	STIM1	NS2B	0|0|11|6	17	4.25	4	1|0|0|1|0|0|0|0	0.5	1	0.5	1	0.5	-2.49	4.09	0.43	NA	685	2	411	99.51	-6.32864	8	4.94392e-06
SYVC_HUMAN	VARS	NS2B	0|0|18|13	31	7.75	4	0|0|2|1|0|0|0|1	0.5	1	0.5	1	0.5	-3.37	3.95	0.38	NA	1264	100	411	75.67	-6.34048	8	4.88293e-06
2AAA_HUMAN	PPP2R1A	NS3	3|3|13|6	25	6.25	4	0|0|2|0|0|0|1|0	0.89	1	0.89	1	0.89	1.31	4.06	0.04	NA	589	132	411	67.88	-6.2081	8	5.55937e-06
C1TM_HUMAN	MTHFD1L	NS3	0|0|17|13	30	7.5	4	0|0|2|2|0|0|3|2	0.5	1	0.5	1	0.5	-5.5	2.74	0.42	NA	978	75	411	81.75	-6.53286	8	3.96281e-06
CHIP_HUMAN	STUB1	NS3	2|1|8|7	18	4.5	4	0|0|2|2|0|0|0|0	0.6	0.99	0.6	0.99	0.6	-1.55	3.17	0.28	NA	303	62	411	84.91	-5.87191	8	7.72047e-06
DNJC7_HUMAN	DNAJC7	NS3	5|3|11|7	26	6.5	4	0|1|0|1|0|0|2|0	0.93	1	0.93	1	0.93	1.02	3.7	0	NA	494	59	411	85.64	-5.99299	8	6.87589e-06
ERAL1_HUMAN	ERAL1	NS3	0|0|6|3	9	2.25	4	0|0|0|0|0|0|0|0	0.5	1	0.5	1	0.5	-1.95	4.49	0.46	NA	437	10	411	97.57	-6.93126	8	2.7221e-06
GRPE1_HUMAN	GRPEL1	NS3	0|0|7|4	11	2.75	4	0|0|0|0|0|0|1|0	0.5	1	0.5	1	0.5	-2.04	4.46	0.45	NA	217	79	411	80.78	-6.03055	8	6.65415e-06
HS105_HUMAN	HSPH1	NS3	1|2|11|11	25	6.25	4	0|0|2|3|0|0|4|2	0.5	0.98	0.5	0.98	0.5	-4.79	2.19	0.36	NA	858	119	411	71.05	-6.58428	8	3.72361e-06
LPPRC_HUMAN	LRPPRC	NS3	0|0|23|15	38	9.5	4	0|0|3|2|0|0|4|2	0.5	1	0.5	1	0.5	-6.51	2.79	0.44	NA	1394	130	411	68.37	-6.65089	8	3.52447e-06
PRS7_HUMAN	PSMC2	NS3	0|0|4|5	9	2.25	4	0|0|1|0|0|0|0|0	0.5	1	0.5	1	0.5	-2.04	4.17	0.45	NA	433	126	411	69.34	-6.92206	8	2.72427e-06
PSMD3_HUMAN	PSMD3	NS3	0|0|7|7	14	3.5	4	0|0|0|1|0|0|0|0	0.5	1	0.5	1	0.5	-2.04	4.81	0.41	NA	534	111	411	72.99	-6.68989	8	3.44658e-06
PSMD6_HUMAN	PSMD6	NS3	0|0|4|4	8	2	4	0|0|1|0|0|0|0|0	0.5	1	0.5	1	0.5	-2.04	4	0.46	NA	389	82	411	80.05	-6.93269	8	2.69263e-06
SGT1_HUMAN	SUGT1	NS3	0|0|8|5	13	3.25	4	0|0|0|0|0|0|0|0	0.5	1	0.5	1	0.5	-1.95	5.02	0.43	NA	365	23	411	94.4	-6.3835	8	4.70754e-06
SLIRP_HUMAN	SLIRP	NS3	0|0|6|3	9	2.25	4	0|0|0|1|0|0|0|0	0.5	1	0.5	1	0.5	-2.04	4.17	0.46	NA	109	53	411	87.1	-5.54267	8	1.0822e-05
STIP1_HUMAN	STIP1	NS3	0|0|19|14	33	8.25	4	0|0|2|3|0|0|3|3	0.5	1	0.5	1	0.5	-6.55	2.58	0.44	NA	543	120	411	70.8	-5.84915	8	7.831e-06
2AAA_HUMAN	PPP2R1A	NS4A	3|2|0|3	8	2	4	0|0|2|0|0|0|1|0	0.52	0.79	0.52	0.79	0.52	-2.97	2.41	0.33	NA	589	132	411	67.88	-6.51366	8	4.08231e-06
AHNK_HUMAN	AHNAK	NS4A	96|121|0|0	217	54.25	4	0|0|2|3|0|0|1|2	0.5	1	0.5	1	0.5	-4.91	5.76	0.36	NA	5890	62	411	84.91	-5.51579	8	1.11972e-05
DNJC7_HUMAN	DNAJC7	NS4A	11|9|1|1	22	5.5	4	0|1|0|1|0|0|2|0	0.5	1	0.5	1	0.5	-1.83	3.46	0.4	NA	494	59	411	85.64	-5.32616	8	1.34708e-05
EF1D_HUMAN	EEF1D	NS4A	13|11|2|6	32	8	4	1|1|5|4|1|2|5|4	0.5	1	0.5	1	0.5	-8.8	1.48	0.35	NA	281	157	411	61.8	-4.38729	8	3.38374e-05
EF1G_HUMAN	EEF1G	NS4A	22|16|2|7	47	11.75	4	2|2|6|4|1|2|4|4	0.52	1	0.52	1	0.52	-9.64	1.91	0.33	NA	437	193	411	53.04	-4.44446	8	3.21573e-05
ENPL_HUMAN	HSP90B1	NS4A	4|3|0|4	11	2.75	4	0|0|0|0|0|0|2|2	0.58	0.83	0.58	0.83	0.58	-3.46	2.46	0.3	NA	803	186	411	54.74	-6.50513	8	4.11881e-06
H4_HUMAN	HIST1H4A	NS4A	1|3|4|5	13	3.25	4	0|0|2|2|0|0|1|2	0.51	0.91	0.51	0.91	0.51	-3.18	1.89	0.34	NA	103	225	411	45.26	-4.28445	8	3.77288e-05
NEDD1_HUMAN	NEDD1	NS4A	6|8|0|0	14	3.5	4	0|0|0|0|0|0|0|0	0.5	1	0.5	1	0.5	-1.95	5.13	0.41	NA	660	8	411	98.05	-6.06785	8	6.45468e-06
NVL_HUMAN	NVL	NS4A	4|5|0|0	9	2.25	4	0|0|0|0|0|0|0|0	0.5	1	0.5	1	0.5	-1.95	4.49	0.44	NA	856	31	411	92.46	-6.76972	8	3.19934e-06
SYVC_HUMAN	VARS	NS4A	16|11|0|1	28	7	4	0|0|2|1|0|0|0|1	0.5	1	0.5	1	0.5	-3.37	3.81	0.39	NA	1264	100	411	75.67	-6.0245	8	6.70915e-06
AHNK_HUMAN	AHNAK	NS4B	84|119|0|0	203	50.75	4	0|0|2|3|0|0|1|2	0.5	1	0.5	1	0.5	-4.91	5.67	0.36	NA	5890	62	411	84.91	-5.26361	8	1.44126e-05
CCDC6_HUMAN	CCDC6	NS4B	15|11|2|0	28	7	4	0|0|0|0|0|0|0|0	0.73	1	0.73	1	0.73	-1.95	6.13	0.19	NA	474	6	411	98.54	-4.72481	8	2.47256e-05
COPB_HUMAN	COPB1	NS4B	4|5|0|3	12	3	4	0|0|2|0|0|0|1|1	0.66	0.99	0.66	0.99	0.66	-3.37	2.58	0.24	NA	953	92	411	77.62	-6.27052	8	5.22882e-06
EF1G_HUMAN	EEF1G	NS4B	21|17|2|5	45	11.25	4	2|2|6|4|1|2|4|4	0.5	1	0.5	1	0.5	-9.64	1.85	0.36	NA	437	193	411	53.04	-4.16908	8	4.25323e-05
ENPL_HUMAN	HSP90B1	NS4B	3|3|0|6	12	3	4	0|0|0|0|0|0|2|2	0.57	0.97	0.57	0.97	0.57	-3.46	2.58	0.31	NA	803	186	411	54.74	-6.09926	8	6.20556e-06
ERLN2_HUMAN	ERLIN2	NS4B	4|4|0|0	8	2	4	0|0|0|0|0|0|0|0	0.5	1	0.5	1	0.5	-1.95	4.32	0.45	NA	339	45	411	89.05	-5.64237	8	9.87781e-06
NEDD1_HUMAN	NEDD1	NS4B	5|6|0|0	11	2.75	4	0|0|0|0|0|0|0|0	0.5	1	0.5	1	0.5	-1.95	4.78	0.43	NA	660	8	411	98.05	-5.99015	8	6.97621e-06
PP4R1_HUMAN	PPP4R1	NS4B	4|4|0|0	8	2	4	0|0|0|0|0|0|0|0	0.5	1	0.5	1	0.5	-1.95	4.32	0.45	NA	950	3	411	99.27	-6.67283	8	3.52483e-06
SYVC_HUMAN	VARS	NS4B	16|9|0|0	25	6.25	4	0|0|2|1|0|0|0|1	0.5	1	0.5	1	0.5	-3.37	3.64	0.4	NA	1264	100	411	75.67	-5.81897	8	8.24723e-06
BCLF1_HUMAN	BCLAF1	NS5	26|17|0|1	44	11	4	0|1|1|1|0|0|0|1	0.5	1	0.5	1	0.5	-3.39	4.46	0.38	NA	920	171	411	58.39	-6.08874	8	6.27801e-06
CSK22_HUMAN	CSNK2A2	NS5	5|3|0|0	8	2	4	0|0|0|0|0|0|0|0	0.5	1	0.5	1	0.5	-1.95	4.32	0.46	NA	350	23	411	94.4	-6.82704	8	3.02108e-06
DHX15_HUMAN	DHX15	NS5	19|18|0|0	37	9.25	4	0|1|5|1|0|0|2|2	0.5	1	0.5	1	0.5	-6.47	2.75	0.43	NA	795	168	411	59.12	-6.11598	8	6.01371e-06
PAF1_HUMAN	PAF1	NS5	12|6|0|0	18	4.5	4	0|0|0|0|0|0|0|0	0.5	1	0.5	1	0.5	-1.95	5.49	0.41	NA	531	50	411	87.83	-6.43294	8	4.48042e-06
SAHH2_HUMAN	AHCYL1	NS5	11|7|0|0	18	4.5	4	0|0|1|0|0|0|0|0	0.5	1	0.5	1	0.5	-2.04	5.17	0.41	NA	530	16	411	96.11	-6.43106	8	4.47009e-06
TR150_HUMAN	THRAP3	NS5	14|12|0|0	26	6.5	4	0|0|3|2|0|0|1|1	0.5	1	0.5	1	0.5	-4.8	2.89	0.42	NA	955	178	411	56.69	-6.65217	8	3.52546e-06
UBP7_HUMAN	USP7	NS5	19|13|0|0	32	8	4	0|0|4|2|0|0|1|1	0.5	1	0.5	1	0.5	-4.74	3	0.44	NA	1102	65	411	84.18	-6.5877	8	3.76579e-06
ZRAB2_HUMAN	ZRANB2	NS5	8|4|0|0	12	3	4	0|0|0|0|0|0|0|0	0.5	1	0.5	1	0.5	-1.95	4.91	0.44	NA	330	73	411	82.24	-6.36274	8	4.80627e-06

## Sheet: STable 4
Bait	Method	Prey
NS1	Y2H	FBLN5
NS1	Y2H	LSM2
NS1	Y2H	MANBA
NS1	Y2H	NNT
NS1	Y2H	PHPT1
NS1	Y2H	RIDA
NS1	Y2H	RMND5A
NS1	Y2H	SEC24D
NS1	Y2H	SELENOP
NS1	Y2H	TCTEX1D2
NS1	Y2H	TIMP4
NS1	Y2H	WDR47
NS1	Y2H	ARIH2
NS1	Y2H	COPS5
NS1	Y2H	DNAJC19
NS1	Y2H	EFTUD2
NS1	Y2H	RACK1
NS1	Y2H	SNAPIN
NS1	Y2H	ZNF350
NS2A	Y2H	CAMLG
NS2B	Y2H	ERBIN
NS2B	Y2H	INIP
NS2B	Y2H	NKIRAS1
NS2B	Y2H	PHTF1
NS2B	Y2H	RNF10
NS2B	Y2H	SLC30A9
NS2B	Y2H	NCAM2
NS2B	Y2H	RAD50
NS2B	Y2H	RTN1
NS3	Y2H	ASPA
NS3	Y2H	ASXL1
NS3	Y2H	ATP1B3
NS3	Y2H	BAZ2B
NS3	Y2H	BCAT1
NS3	Y2H	BRD2
NS3	Y2H	CA2
NS3	Y2H	CEP192
NS3	Y2H	CNRIP1
NS3	Y2H	COL5A2
NS3	Y2H	COPB1
NS3	Y2H	CTSV
NS3	Y2H	DCN
NS3	Y2H	DCTN6
NS3	Y2H	DYNC1I2
NS3	Y2H	FBLN5
NS3	Y2H	FIP1L1
NS3	Y2H	GAB1
NS3	Y2H	GNPTAB
NS3	Y2H	IL1RAP
NS3	Y2H	MAP1B
NS3	Y2H	ME2
NS3	Y2H	MPP1
NS3	Y2H	NUDCD1
NS3	Y2H	OLFM1
NS3	Y2H	OSBPL1A
NS3	Y2H	PAPSS1
NS3	Y2H	PDE4DIP
NS3	Y2H	PDHB
NS3	Y2H	PGM1
NS3	Y2H	POGZ
NS3	Y2H	POLR1C
NS3	Y2H	PON2
NS3	Y2H	QRICH1
NS3	Y2H	RELN
NS3	Y2H	SDHB
NS3	Y2H	SGIP1
NS3	Y2H	SNX6
NS3	Y2H	SUMO1
NS3	Y2H	TLE2
NS3	Y2H	ZBTB38
NS3	Y2H	ZNF155
NS3	Y2H	ZNF225
NS3	Y2H	ZNF23
NS3	Y2H	ZNF251
NS3	Y2H	ZNF350
NS3	Y2H	ZNF577
NS3	Y2H	ZNF582
NS3	Y2H	ZSCAN9
NS3	Y2H	AHCYL1
NS3	Y2H	ATP1B1
NS3	Y2H	DDX5
NS3	Y2H	N4BP2L2
NS3	Y2H	RACK1
NS3	Y2H	SIAH2
NS4A	Y2H	CNTN3
NS4A	Y2H	EPHA4
NS4A	Y2H	ERMN
NS4A	Y2H	NCAM2
NS4A	Y2H	OMG
NS4A	Y2H	RTN1
NS4B	Y2H	BCLAF1
NS4B	Y2H	COPS5
NS5	Y2H	FAM184A
NS5	Y2H	KRT222
NS5	Y2H	PIAS1
NS5	Y2H	ZMYM5
NS5	Y2H	ATP1B1
NS5	Y2H	COPS5
NS5	Y2H	DCAF6
NS5	Y2H	N4BP2L2
NS1	TAP-MS	PPP2R1A
NS1	TAP-MS	BAG2
NS1	TAP-MS	CCDC6
NS1	TAP-MS	STUB1
NS1	TAP-MS	DNAJC7
NS1	TAP-MS	IRS4
NS1	TAP-MS	PSMD11
NS1	TAP-MS	PSMD2
NS1	TAP-MS	PSMD3
NS1	TAP-MS	CCT2
NS1	TAP-MS	CCT5
NS1	TAP-MS	CCT7
NS1	TAP-MS	CCT8
NS2A	TAP-MS	BAG6
NS2A	TAP-MS	CCDC6
NS2A	TAP-MS	DDX21
NS2A	TAP-MS	DNAJC7
NS2A	TAP-MS	GET4
NS2A	TAP-MS	HIST1H4A
NS2A	TAP-MS	IPO5
NS2A	TAP-MS	LRPPRC
NS2A	TAP-MS	PPME1
NS2A	TAP-MS	PSMC1
NS2A	TAP-MS	PSMC4
NS2A	TAP-MS	PSMC2
NS2A	TAP-MS	PSMC5
NS2A	TAP-MS	PSMA6
NS2A	TAP-MS	PSMB5
NS2A	TAP-MS	PSMD11
NS2A	TAP-MS	PSMD12
NS2A	TAP-MS	PSMD13
NS2A	TAP-MS	PSMD2
NS2A	TAP-MS	PSMD3
NS2A	TAP-MS	PSMD4
NS2A	TAP-MS	PSMD6
NS2A	TAP-MS	RAB18
NS2A	TAP-MS	RPN1
NS2A	TAP-MS	VCP
NS2A	TAP-MS	UBL4A
NS2A	TAP-MS	VTA1
NS2B	TAP-MS	AHNAK
NS2B	TAP-MS	CCDC6
NS2B	TAP-MS	DDX21
NS2B	TAP-MS	EEF1D
NS2B	TAP-MS	KIF4A
NS2B	TAP-MS	NEDD1
NS2B	TAP-MS	STIM1
NS2B	TAP-MS	VARS
NS3	TAP-MS	PPP2R1A
NS3	TAP-MS	MTHFD1L
NS3	TAP-MS	STUB1
NS3	TAP-MS	DNAJC7
NS3	TAP-MS	ERAL1
NS3	TAP-MS	GRPEL1
NS3	TAP-MS	HSPH1
NS3	TAP-MS	LRPPRC
NS3	TAP-MS	PSMC2
NS3	TAP-MS	PSMD3
NS3	TAP-MS	PSMD6
NS3	TAP-MS	SUGT1
NS3	TAP-MS	SLIRP
NS3	TAP-MS	STIP1
NS4A	TAP-MS	PPP2R1A
NS4A	TAP-MS	AHNAK
NS4A	TAP-MS	DNAJC7
NS4A	TAP-MS	EEF1D
NS4A	TAP-MS	EEF1G
NS4A	TAP-MS	HSP90B1
NS4A	TAP-MS	HIST1H4A
NS4A	TAP-MS	NEDD1
NS4A	TAP-MS	NVL
NS4A	TAP-MS	VARS
NS4B	TAP-MS	AHNAK
NS4B	TAP-MS	CCDC6
NS4B	TAP-MS	COPB1
NS4B	TAP-MS	EEF1G
NS4B	TAP-MS	HSP90B1
NS4B	TAP-MS	ERLIN2
NS4B	TAP-MS	NEDD1
NS4B	TAP-MS	PPP4R1
NS4B	TAP-MS	VARS
NS5	TAP-MS	BCLAF1
NS5	TAP-MS	CSNK2A2
NS5	TAP-MS	DHX15
NS5	TAP-MS	PAF1
NS5	TAP-MS	AHCYL1
NS5	TAP-MS	THRAP3
NS5	TAP-MS	USP7
NS5	TAP-MS	ZRANB2

## Sheet: STable 5
Gene Set	Description	Size	Expect	Ratio	P Value	FDR
GO:0031647	regulation of protein stability	267	2.3622	5.9267	1.0199e-07	0
GO:0043687	post-translational protein modification	360	3.185	5.0236	1.1674e-07	0
GO:0006457	protein folding	210	1.8579	6.4589	3.496e-07	0
GO:0010498	proteasomal protein catabolic process	449	3.9724	6.0417	1.1067e-12	9.4067e-10
GO:0070646	protein modification by small protein removal	288	2.548	7.0644	7.6894e-11	3.268e-08
GO:0042176	regulation of protein catabolic process	370	3.2735	5.4988	4.3195e-09	1.2239e-06
GO:0045862	positive regulation of proteolysis	343	3.0346	4.284	0	0.0013
GO:0009896	positive regulation of catabolic process	409	3.6185	3.869	0	0.0017
GO:0002446	neutrophil mediated immunity	496	4.3882	3.1904	0.0001	0.0117
GO:0036230	granulocyte activation	500	4.4236	3.1649	0.0001	0.0117
GO:0072350	tricarboxylic acid metabolic process	38	0.3362	11.898	0.0003	0.0264
GO:1901998	toxin transport	39	0.345	11.593	0.0004	0.0268
GO:0043462	regulation of ATPase activity	78	0.6901	7.2455	0.0006	0.0413
ID: GO:0031647; Name: regulation of protein stability
size=267; overlap=14; expect=2.36; enrichmentRatio=5.93; PValue=1.020e-7; FDR=0.000e+0
User ID	Gene Symbol	Gene Name	Entrez Gene
BAG2	BAG2	BCL2 associated athanogene 2	9532
CCT2	CCT2	chaperonin containing TCP1 subunit 2	10576
CCT5	CCT5	chaperonin containing TCP1 subunit 5	22948
CCT7	CCT7	chaperonin containing TCP1 subunit 7	10574
CCT8	CCT8	chaperonin containing TCP1 subunit 8	10694
STUB1	STUB1	STIP1 homology and U-box containing protein 1	10273
BAG6	BAG6	BCL2 associated athanogene 6	7917
GET4	GET4	golgi to ER traffic protein 4	51608
SUGT1	SUGT1	SGT1 homolog, MIS12 kinetochore complex assembly cochaperone	10910
ATP1B1	ATP1B1	ATPase Na+/K+ transporting subunit beta 1	481
ATP1B3	ATP1B3	ATPase Na+/K+ transporting subunit beta 3	483
SUMO1	SUMO1	small ubiquitin-like modifier 1	7341
EPHA4	EPHA4	EPH receptor A4	2043
USP7	USP7	ubiquitin specific peptidase 7	7874
ID: GO:0043687; Name: post-translational protein modification
size=360; overlap=16; expect=3.19; enrichmentRatio=5.02; PValue=1.167e-7; FDR=0.000e+0
User ID	Gene Symbol	Gene Name	Entrez Gene
PSMD11	PSMD11	proteasome 26S subunit, non-ATPase 11	5717
PSMD3	PSMD3	proteasome 26S subunit, non-ATPase 3	5709
COPS5	COPS5	COP9 signalosome subunit 5	10987
PSMA6	PSMA6	proteasome subunit alpha 6	5687
PSMB5	PSMB5	proteasome subunit beta 5	5693
PSMC1	PSMC1	proteasome 26S subunit, ATPase 1	5700
PSMC2	PSMC2	proteasome 26S subunit, ATPase 2	5701
PSMC4	PSMC4	proteasome 26S subunit, ATPase 4	5704
PSMC5	PSMC5	proteasome 26S subunit, ATPase 5	5705
PSMD12	PSMD12	proteasome 26S subunit, non-ATPase 12	5718
PSMD13	PSMD13	proteasome 26S subunit, non-ATPase 13	5719
PSMD2	PSMD2	proteasome 26S subunit, non-ATPase 2	5708
PSMD4	PSMD4	proteasome 26S subunit, non-ATPase 4	5710
PSMD6	PSMD6	proteasome 26S subunit, non-ATPase 6	9861
HSP90B1	HSP90B1	heat shock protein 90 beta family member 1	7184
DCAF6	DCAF6	DDB1 and CUL4 associated factor 6	55827
ID: GO:0006457; Name: protein folding
size=210; overlap=12; expect=1.86; enrichmentRatio=6.46; PValue=3.496e-7; FDR=0.000e+0
User ID	Gene Symbol	Gene Name	Entrez Gene
BAG2	BAG2	BCL2 associated athanogene 2	9532
CCT2	CCT2	chaperonin containing TCP1 subunit 2	10576
CCT5	CCT5	chaperonin containing TCP1 subunit 5	22948
CCT7	CCT7	chaperonin containing TCP1 subunit 7	10574
CCT8	CCT8	chaperonin containing TCP1 subunit 8	10694
DNAJC7	DNAJC7	DnaJ heat shock protein family (Hsp40) member C7	7266
DNAJC19	DNAJC19	DnaJ heat shock protein family (Hsp40) member C19	131118
PSMC1	PSMC1	proteasome 26S subunit, ATPase 1	5700
VCP	VCP	valosin containing protein	7415
GRPEL1	GRPEL1	GrpE like 1, mitochondrial	80273
HSPH1	HSPH1	heat shock protein family H (Hsp110) member 1	10808
HSP90B1	HSP90B1	heat shock protein 90 beta family member 1	7184
ID: GO:0010498; Name: proteasomal protein catabolic process
size=449; overlap=24; expect=3.97; enrichmentRatio=6.04; PValue=1.107e-12; FDR=9.407e-10
User ID	Gene Symbol	Gene Name	Entrez Gene
BAG2	BAG2	BCL2 associated athanogene 2	9532
STUB1	STUB1	STIP1 homology and U-box containing protein 1	10273
ARIH2	ARIH2	ariadne RBR E3 ubiquitin protein ligase 2	10425
RACK1	RACK1	receptor for activated C kinase 1	10399
RMND5A	RMND5A	required for meiotic nuclear division 5 homolog A	64795
BAG6	BAG6	BCL2 associated athanogene 6	7917
GET4	GET4	golgi to ER traffic protein 4	51608
PSMA6	PSMA6	proteasome subunit alpha 6	5687
PSMB5	PSMB5	proteasome subunit beta 5	5693
PSMC1	PSMC1	proteasome 26S subunit, ATPase 1	5700
PSMC2	PSMC2	proteasome 26S subunit, ATPase 2	5701
PSMC4	PSMC4	proteasome 26S subunit, ATPase 4	5704
PSMC5	PSMC5	proteasome 26S subunit, ATPase 5	5705
PSMD12	PSMD12	proteasome 26S subunit, non-ATPase 12	5718
PSMD2	PSMD2	proteasome 26S subunit, non-ATPase 2	5708
PSMD4	PSMD4	proteasome 26S subunit, non-ATPase 4	5710
PSMD6	PSMD6	proteasome 26S subunit, non-ATPase 6	9861
VCP	VCP	valosin containing protein	7415
SIAH2	SIAH2	siah E3 ubiquitin protein ligase 2	6478
SUMO1	SUMO1	small ubiquitin-like modifier 1	7341
HSP90B1	HSP90B1	heat shock protein 90 beta family member 1	7184
ERLIN2	ERLIN2	ER lipid raft associated 2	11160
USP7	USP7	ubiquitin specific peptidase 7	7874
PIAS1	PIAS1	protein inhibitor of activated STAT 1	8554
ID: GO:0070646; Name: protein modification by small protein removal
size=288; overlap=18; expect=2.55; enrichmentRatio=7.06; PValue=7.689e-11; FDR=3.268e-8
User ID	Gene Symbol	Gene Name	Entrez Gene
PSMD11	PSMD11	proteasome 26S subunit, non-ATPase 11	5717
PSMD3	PSMD3	proteasome 26S subunit, non-ATPase 3	5709
COPS5	COPS5	COP9 signalosome subunit 5	10987
PSMA6	PSMA6	proteasome subunit alpha 6	5687
PSMB5	PSMB5	proteasome subunit beta 5	5693
PSMC1	PSMC1	proteasome 26S subunit, ATPase 1	5700
PSMC2	PSMC2	proteasome 26S subunit, ATPase 2	5701
PSMC4	PSMC4	proteasome 26S subunit, ATPase 4	5704
PSMC5	PSMC5	proteasome 26S subunit, ATPase 5	5705
PSMD12	PSMD12	proteasome 26S subunit, non-ATPase 12	5718
PSMD13	PSMD13	proteasome 26S subunit, non-ATPase 13	5719
PSMD2	PSMD2	proteasome 26S subunit, non-ATPase 2	5708
PSMD4	PSMD4	proteasome 26S subunit, non-ATPase 4	5710
PSMD6	PSMD6	proteasome 26S subunit, non-ATPase 6	9861
VCP	VCP	valosin containing protein	7415
ASXL1	ASXL1	ASXL transcriptional regulator 1	171023
SIAH2	SIAH2	siah E3 ubiquitin protein ligase 2	6478
USP7	USP7	ubiquitin specific peptidase 7	7874
ID: GO:0042176; Name: regulation of protein catabolic process
size=370; overlap=18; expect=3.27; enrichmentRatio=5.50; PValue=4.320e-9; FDR=1.224e-6
User ID	Gene Symbol	Gene Name	Entrez Gene
BAG2	BAG2	BCL2 associated athanogene 2	9532
PSMD3	PSMD3	proteasome 26S subunit, non-ATPase 3	5709
STUB1	STUB1	STIP1 homology and U-box containing protein 1	10273
ARIH2	ARIH2	ariadne RBR E3 ubiquitin protein ligase 2	10425
RACK1	RACK1	receptor for activated C kinase 1	10399
TIMP4	TIMP4	TIMP metallopeptidase inhibitor 4	7079
BAG6	BAG6	BCL2 associated athanogene 6	7917
PSMC1	PSMC1	proteasome 26S subunit, ATPase 1	5700
PSMC2	PSMC2	proteasome 26S subunit, ATPase 2	5701
PSMC4	PSMC4	proteasome 26S subunit, ATPase 4	5704
PSMC5	PSMC5	proteasome 26S subunit, ATPase 5	5705
PSMD2	PSMD2	proteasome 26S subunit, non-ATPase 2	5708
VCP	VCP	valosin containing protein	7415
SUMO1	SUMO1	small ubiquitin-like modifier 1	7341
EPHA4	EPHA4	EPH receptor A4	2043
CSNK2A2	CSNK2A2	casein kinase 2 alpha 2	1459
USP7	USP7	ubiquitin specific peptidase 7	7874
PIAS1	PIAS1	protein inhibitor of activated STAT 1	8554
ID: GO:0045862; Name: positive regulation of proteolysis
size=343; overlap=13; expect=3.03; enrichmentRatio=4.28; PValue=0.000e+0; FDR=1.300e-3
User ID	Gene Symbol	Gene Name	Entrez Gene
BAG2	BAG2	BCL2 associated athanogene 2	9532
STUB1	STUB1	STIP1 homology and U-box containing protein 1	10273
ARIH2	ARIH2	ariadne RBR E3 ubiquitin protein ligase 2	10425
RACK1	RACK1	receptor for activated C kinase 1	10399
BAG6	BAG6	BCL2 associated athanogene 6	7917
PSMC1	PSMC1	proteasome 26S subunit, ATPase 1	5700
PSMC2	PSMC2	proteasome 26S subunit, ATPase 2	5701
PSMC4	PSMC4	proteasome 26S subunit, ATPase 4	5704
PSMC5	PSMC5	proteasome 26S subunit, ATPase 5	5705
VCP	VCP	valosin containing protein	7415
SUMO1	SUMO1	small ubiquitin-like modifier 1	7341
EPHA4	EPHA4	EPH receptor A4	2043
PIAS1	PIAS1	protein inhibitor of activated STAT 1	8554
ID: GO:0009896; Name: positive regulation of catabolic process
size=409; overlap=14; expect=3.62; enrichmentRatio=3.87; PValue=0.000e+0; FDR=1.700e-3
User ID	Gene Symbol	Gene Name	Entrez Gene
BAG2	BAG2	BCL2 associated athanogene 2	9532
STUB1	STUB1	STIP1 homology and U-box containing protein 1	10273
ARIH2	ARIH2	ariadne RBR E3 ubiquitin protein ligase 2	10425
NNT	NNT	nicotinamide nucleotide transhydrogenase	23530
RACK1	RACK1	receptor for activated C kinase 1	10399
BAG6	BAG6	BCL2 associated athanogene 6	7917
PSMC1	PSMC1	proteasome 26S subunit, ATPase 1	5700
PSMC2	PSMC2	proteasome 26S subunit, ATPase 2	5701
PSMC4	PSMC4	proteasome 26S subunit, ATPase 4	5704
PSMC5	PSMC5	proteasome 26S subunit, ATPase 5	5705
VCP	VCP	valosin containing protein	7415
DCN	DCN	decorin	1634
SUMO1	SUMO1	small ubiquitin-like modifier 1	7341
PIAS1	PIAS1	protein inhibitor of activated STAT 1	8554
ID: GO:0002446; Name: neutrophil mediated immunity
size=496; overlap=14; expect=4.39; enrichmentRatio=3.19; PValue=1.000e-4; FDR=1.170e-2
User ID	Gene Symbol	Gene Name	Entrez Gene
CCT2	CCT2	chaperonin containing TCP1 subunit 2	10576
CCT8	CCT8	chaperonin containing TCP1 subunit 8	10694
PSMD11	PSMD11	proteasome 26S subunit, non-ATPase 11	5717
PSMD3	PSMD3	proteasome 26S subunit, non-ATPase 3	5709
MANBA	MANBA	mannosidase beta	4126
PSMC2	PSMC2	proteasome 26S subunit, ATPase 2	5701
PSMD12	PSMD12	proteasome 26S subunit, non-ATPase 12	5718
PSMD13	PSMD13	proteasome 26S subunit, non-ATPase 13	5719
PSMD2	PSMD2	proteasome 26S subunit, non-ATPase 2	5708
PSMD6	PSMD6	proteasome 26S subunit, non-ATPase 6	9861
RAB18	RAB18	RAB18, member RAS oncogene family	22931
VCP	VCP	valosin containing protein	7415
COPB1	COPB1	coatomer protein complex subunit beta 1	1315
PGM1	PGM1	phosphoglucomutase 1	5236
ID: GO:0036230; Name: granulocyte activation
size=500; overlap=14; expect=4.42; enrichmentRatio=3.16; PValue=1.000e-4; FDR=1.170e-2
User ID	Gene Symbol	Gene Name	Entrez Gene
CCT2	CCT2	chaperonin containing TCP1 subunit 2	10576
CCT8	CCT8	chaperonin containing TCP1 subunit 8	10694
PSMD11	PSMD11	proteasome 26S subunit, non-ATPase 11	5717
PSMD3	PSMD3	proteasome 26S subunit, non-ATPase 3	5709
MANBA	MANBA	mannosidase beta	4126
PSMC2	PSMC2	proteasome 26S subunit, ATPase 2	5701
PSMD12	PSMD12	proteasome 26S subunit, non-ATPase 12	5718
PSMD13	PSMD13	proteasome 26S subunit, non-ATPase 13	5719
PSMD2	PSMD2	proteasome 26S subunit, non-ATPase 2	5708
PSMD6	PSMD6	proteasome 26S subunit, non-ATPase 6	9861
RAB18	RAB18	RAB18, member RAS oncogene family	22931
VCP	VCP	valosin containing protein	7415
COPB1	COPB1	coatomer protein complex subunit beta 1	1315
PGM1	PGM1	phosphoglucomutase 1	5236
ID: GO:0072350; Name: tricarboxylic acid metabolic process
size=38; overlap=4; expect=0.34; enrichmentRatio=11.90; PValue=3.000e-4; FDR=2.640e-2
User ID	Gene Symbol	Gene Name	Entrez Gene
NNT	NNT	nicotinamide nucleotide transhydrogenase	23530
ME2	ME2	malic enzyme 2	4200
PDHB	PDHB	pyruvate dehydrogenase E1 beta subunit	5162
SDHB	SDHB	succinate dehydrogenase complex iron sulfur subunit B	6390
ID: GO:1901998; Name: toxin transport
size=39; overlap=4; expect=0.34; enrichmentRatio=11.59; PValue=4.000e-4; FDR=2.680e-2
User ID	Gene Symbol	Gene Name	Entrez Gene
CCT2	CCT2	chaperonin containing TCP1 subunit 2	10576
CCT5	CCT5	chaperonin containing TCP1 subunit 5	22948
CCT7	CCT7	chaperonin containing TCP1 subunit 7	10574
CCT8	CCT8	chaperonin containing TCP1 subunit 8	10694
ID: GO:0043462; Name: regulation of ATPase activity
size=78; overlap=5; expect=0.69; enrichmentRatio=7.25; PValue=6.000e-4; FDR=4.130e-2
User ID	Gene Symbol	Gene Name	Entrez Gene
DNAJC7	DNAJC7	DnaJ heat shock protein family (Hsp40) member C7	7266
DNAJC19	DNAJC19	DnaJ heat shock protein family (Hsp40) member C19	131118
ATP1B1	ATP1B1	ATPase Na+/K+ transporting subunit beta 1	481
ATP1B3	ATP1B3	ATPase Na+/K+ transporting subunit beta 3	483
SUMO1	SUMO1	small ubiquitin-like modifier 1	7341

## Sheet: STable 6
Gene Set	Description	Size	Expect	Ratio	P Value	FDR
GO:1905368	peptidase complex	89	1.0156	13.785	1.0569e-12	1.8179e-10
GO:0101031	chaperone complex	21	0.2396	29.212	2.1357e-09	1.8367e-07
GO:0101002	ficolin-1-rich granule	183	2.0882	5.2677	7.2347e-06	0.0004
GO:0044445	cytosolic part	244	2.7843	4.3099	0	0.0009
GO:0031983	vesicle lumen	337	3.8455	3.3806	0.0001	0.004
GO:0043209	myelin sheath	158	1.8029	4.4372	0.0004	0.0125
ID: GO:1905368; Name: peptidase complex
size=89; overlap=14; expect=1.02; enrichmentRatio=13.79; PValue=1.057e-12; FDR=1.818e-10
User ID	Gene Symbol	Gene Name	Entrez Gene
PSMD11	PSMD11	proteasome 26S subunit, non-ATPase 11	5717
PSMD3	PSMD3	proteasome 26S subunit, non-ATPase 3	5709
PSMA6	PSMA6	proteasome subunit alpha 6	5687
PSMB5	PSMB5	proteasome subunit beta 5	5693
PSMC1	PSMC1	proteasome 26S subunit, ATPase 1	5700
PSMC2	PSMC2	proteasome 26S subunit, ATPase 2	5701
PSMC4	PSMC4	proteasome 26S subunit, ATPase 4	5704
PSMC5	PSMC5	proteasome 26S subunit, ATPase 5	5705
PSMD12	PSMD12	proteasome 26S subunit, non-ATPase 12	5718
PSMD13	PSMD13	proteasome 26S subunit, non-ATPase 13	5719
PSMD2	PSMD2	proteasome 26S subunit, non-ATPase 2	5708
PSMD4	PSMD4	proteasome 26S subunit, non-ATPase 4	5710
PSMD6	PSMD6	proteasome 26S subunit, non-ATPase 6	9861
VCP	VCP	valosin containing protein	7415
ID: GO:0101031; Name: chaperone complex
size=21; overlap=7; expect=0.24; enrichmentRatio=29.21; PValue=2.136e-9; FDR=1.837e-7
User ID	Gene Symbol	Gene Name	Entrez Gene
BAG2	BAG2	BCL2 associated athanogene 2	9532
CCT2	CCT2	chaperonin containing TCP1 subunit 2	10576
CCT5	CCT5	chaperonin containing TCP1 subunit 5	22948
CCT7	CCT7	chaperonin containing TCP1 subunit 7	10574
CCT8	CCT8	chaperonin containing TCP1 subunit 8	10694
STUB1	STUB1	STIP1 homology and U-box containing protein 1	10273
STIP1	STIP1	stress induced phosphoprotein 1	10963
ID: GO:0101002; Name: ficolin-1-rich granule
size=183; overlap=11; expect=2.09; enrichmentRatio=5.27; PValue=7.235e-6; FDR=4.000e-4
User ID	Gene Symbol	Gene Name	Entrez Gene
CCT8	CCT8	chaperonin containing TCP1 subunit 8	10694
PSMD11	PSMD11	proteasome 26S subunit, non-ATPase 11	5717
PSMD3	PSMD3	proteasome 26S subunit, non-ATPase 3	5709
PSMC2	PSMC2	proteasome 26S subunit, ATPase 2	5701
PSMD12	PSMD12	proteasome 26S subunit, non-ATPase 12	5718
PSMD13	PSMD13	proteasome 26S subunit, non-ATPase 13	5719
PSMD2	PSMD2	proteasome 26S subunit, non-ATPase 2	5708
PSMD6	PSMD6	proteasome 26S subunit, non-ATPase 6	9861
VCP	VCP	valosin containing protein	7415
COPB1	COPB1	coatomer protein complex subunit beta 1	1315
PGM1	PGM1	phosphoglucomutase 1	5236
ID: GO:0044445; Name: cytosolic part
size=244; overlap=12; expect=2.78; enrichmentRatio=4.31; PValue=0.000e+0; FDR=9.000e-4
User ID	Gene Symbol	Gene Name	Entrez Gene
CCT2	CCT2	chaperonin containing TCP1 subunit 2	10576
CCT5	CCT5	chaperonin containing TCP1 subunit 5	22948
CCT7	CCT7	chaperonin containing TCP1 subunit 7	10574
CCT8	CCT8	chaperonin containing TCP1 subunit 8	10694
RACK1	RACK1	receptor for activated C kinase 1	10399
SNAPIN	SNAPIN	SNAP associated protein	23557
BAG6	BAG6	BCL2 associated athanogene 6	7917
GET4	GET4	golgi to ER traffic protein 4	51608
PSMC4	PSMC4	proteasome 26S subunit, ATPase 4	5704
PSMC5	PSMC5	proteasome 26S subunit, ATPase 5	5705
PSMD2	PSMD2	proteasome 26S subunit, non-ATPase 2	5708
UBL4A	UBL4A	ubiquitin like 4A	8266
ID: GO:0031983; Name: vesicle lumen
size=337; overlap=13; expect=3.85; enrichmentRatio=3.38; PValue=1.000e-4; FDR=4.000e-3
User ID	Gene Symbol	Gene Name	Entrez Gene
CCT2	CCT2	chaperonin containing TCP1 subunit 2	10576
CCT8	CCT8	chaperonin containing TCP1 subunit 8	10694
PSMD11	PSMD11	proteasome 26S subunit, non-ATPase 11	5717
PSMD3	PSMD3	proteasome 26S subunit, non-ATPase 3	5709
SELENOP	SELENOP	selenoprotein P	6414
PSMC2	PSMC2	proteasome 26S subunit, ATPase 2	5701
PSMD12	PSMD12	proteasome 26S subunit, non-ATPase 12	5718
PSMD13	PSMD13	proteasome 26S subunit, non-ATPase 13	5719
PSMD2	PSMD2	proteasome 26S subunit, non-ATPase 2	5708
PSMD6	PSMD6	proteasome 26S subunit, non-ATPase 6	9861
VCP	VCP	valosin containing protein	7415
HSPH1	HSPH1	heat shock protein family H (Hsp110) member 1	10808
HSP90B1	HSP90B1	heat shock protein 90 beta family member 1	7184
ID: GO:0043209; Name: myelin sheath
size=158; overlap=8; expect=1.80; enrichmentRatio=4.44; PValue=4.000e-4; FDR=1.250e-2
User ID	Gene Symbol	Gene Name	Entrez Gene
CCT2	CCT2	chaperonin containing TCP1 subunit 2	10576
CCT5	CCT5	chaperonin containing TCP1 subunit 5	22948
VCP	VCP	valosin containing protein	7415
STIP1	STIP1	stress induced phosphoprotein 1	10963
ATP1B1	ATP1B1	ATPase Na+/K+ transporting subunit beta 1	481
CA2	CA2	carbonic anhydrase 2	760
CNRIP1	CNRIP1	cannabinoid receptor interacting protein 1	25927
ERMN	ERMN	ermin	57471

## Sheet: STable 7
Total per GO
		peptidase complex	chaperone complex	ficolin-1-rich granule	cytosolic part	vesicle lumen	myelin sheath
	Total	17	8	18	14	20	9
	Size	89	21	183	244	337	158
Total per NS
		peptidase complex	chaperone complex	ficolin-1-rich granule	cytosolic part	vesicle lumen	myelin sheath
	NS1	3	6	4	7	6	2
	NS2A	12	0	8	6	8	1
	NS2B	0	0	0	0	0	0
	NS3	2	2	5	1	4	4
	NS4A	0	0	0	0	1	1
	NS4B	0	0	1	0	1	0
	NS5	0	0	0	0	0	1
ratio
		peptidase complex	chaperone complex	ficolin-1-rich granule	cytosolic part	vesicle lumen	myelin sheath
	NS1	17.6471	75	22.2222	50	30	22.2222
	NS2A	70.5882	0	44.4444	42.8571	40	11.1111
	NS2B	0	0	0	0	0	0
	NS3	11.7647	25	27.7778	7.14286	20	44.4444
	NS4A	0	0	0	0	5	11.1111
	NS4B	0	0	5.55556	0	5	0
	NS5	0	0	0	0	0	11.1111
Enrichment
		peptidase complex	chaperone complex	ficolin-1-rich granule	cytosolic part	vesicle lumen	myelin sheath
	NS1	1.28016	2.56744	4.21858	11.6012	8.87416	5.00816
	NS2A	5.12066	0	8.43716	9.94388	11.8322	2.50408
	NS2B	0	0	0	0	0	0
	NS3	0.853443	0.855813	5.27323	1.65731	5.91611	10.0163
	NS4A	0	0	0	0	1.47903	2.50408
	NS4B	0	0	1.05465	0	1.47903	0
	NS5	0	0	0	0	0	2.50408
lowest non-zero value	0.855813
1/2 lowest non-zero	0.427906
		peptidase complex	chaperone complex	ficolin-1-rich granule	cytosolic part	vesicle lumen	myelin sheath
	NS1	1.28016	2.56744	4.21858	11.6012	8.87416	5.00816
	NS2A	5.12066	0.427906	8.43716	9.94388	11.8322	2.50408
	NS2B	0.427906	0.427906	0.427906	0.427906	0.427906	0.427906
	NS3	0.853443	0.855813	5.27323	1.65731	5.91611	10.0163
	NS4A	0.427906	0.427906	0.427906	0.427906	1.47903	2.50408
	NS4B	0.427906	0.427906	1.05465	0.427906	1.47903	0.427906
	NS5	0.427906	0.427906	0.427906	0.427906	0.427906	2.50408
Log2
		peptidase complex	chaperone complex	ficolin-1-rich granule	cytosolic part	vesicle lumen	myelin sheath
	NS1	0.356328	1.36033	2.07676	3.5362	3.14961	2.32428
	NS2A	2.35633	-1.22463	3.07676	3.31381	3.56465	1.32428
	NS2B	-1.22463	-1.22463	-1.22463	-1.22463	-1.22463	-1.22463
	NS3	-0.228634	-0.224633	2.39869	0.728847	2.56465	3.32428
	NS4A	-1.22463	-1.22463	-1.22463	-1.22463	0.564649	1.32428
	NS4B	-1.22463	-1.22463	0.076758	-1.22463	0.564649	-1.22463
	NS5	-1.22463	-1.22463	-1.22463	-1.22463	-1.22463	1.32428

## Sheet: STable 8
Total per GO
		regulation of protein stability	post-translational protein modification	protein folding	proteasomal protein catabolic process	protein modification by small protein removal	regulation of protein catabolic process	positive regulation of proteolysis	positive regulation of catabolic process	neutrophil mediated immunity	granulocyte activation	tricarboxylic acid metabolic process	toxin transport	regulation of ATPase activity
	Total	16	25	16	30	26	24	16	17	21	21	4	4	9
	Size	267	360	210	449	288	370	343	409	496	500	38	39	78
Total per NS
		regulation of protein stability	post-translational protein modification	protein folding	proteasomal protein catabolic process	protein modification by small protein removal	regulation of protein catabolic process	positive regulation of proteolysis	positive regulation of catabolic process	neutrophil mediated immunity	granulocyte activation	tricarboxylic acid metabolic process	toxin transport	regulation of ATPase activity
	NS1	6	4	7	6	4	7	4	5	6	6	1	4	2
	NS2A	2	13	3	13	14	8	6	6	9	9	0	0	1
	NS2B	0	0	0	0	0	0	0	0	0	0	0	0	0
	NS3	5	3	3	6	5	5	4	5	5	5	3	0	4
	NS4A	1	1	2	1	0	1	1	0	0	0	0	0	1
	NS4B	0	2	1	2	1	0	0	0	1	1	0	0	0
	NS5	2	2	0	2	2	3	1	1	0	0	0	0	1
Ratio
		regulation of protein stability	post-translational protein modification	protein folding	proteasomal protein catabolic process	protein modification by small protein removal	regulation of protein catabolic process	positive regulation of proteolysis	positive regulation of catabolic process	neutrophil mediated immunity	granulocyte activation	tricarboxylic acid metabolic process	toxin transport	regulation of ATPase activity
	NS1	37.5	16	43.75	20	15.3846	29.1667	25	29.4118	28.5714	28.5714	25	100	22.2222
	NS2A	12.5	52	18.75	43.3333	53.8462	33.3333	37.5	35.2941	42.8571	42.8571	0	0	11.1111
	NS2B	0	0	0	0	0	0	0	0	0	0	0	0	0
	NS3	31.25	12	18.75	20	19.2308	20.8333	25	29.4118	23.8095	23.8095	75	0	44.4444
	NS4A	6.25	4	12.5	3.33333	0	4.16667	6.25	0	0	0	0	0	11.1111
	NS4B	0	8	6.25	6.66667	3.84615	0	0	0	4.7619	4.7619	0	0	0
	NS5	12.5	8	0	6.66667	7.69231	12.5	6.25	5.88235	0	0	0	0	11.1111
Enrichment
		regulation of protein stability	post-translational protein modification	protein folding	proteasomal protein catabolic process	protein modification by small protein removal	regulation of protein catabolic process	positive regulation of proteolysis	positive regulation of catabolic process	neutrophil mediated immunity	granulocyte activation	tricarboxylic acid metabolic process	toxin transport	regulation of ATPase activity
	NS1	6.3273	3.18497	6.7736	3.31033	2.17777	5.30419	5.83567	7.6019	8.95544	9.02759	2.10119	8.62589	3.06704
	NS2A	2.1091	10.3511	2.90297	7.17237	7.62218	6.06193	8.7535	9.12228	13.4332	13.5414	0	0	1.53352
	NS2B	0	0	0	0	0	0	0	0	0	0	0	0	0
	NS3	5.27275	2.38873	2.90297	3.31033	2.72221	3.78871	5.83567	7.6019	7.46286	7.52299	6.30358	0	6.13408
	NS4A	1.05455	0.796242	1.93531	0.551721	0	0.757741	1.45892	0	0	0	0	0	1.53352
	NS4B	0	1.59248	0.967657	1.10344	0.544442	0	0	0	1.49257	1.5046	0	0	0
	NS5	2.1091	1.59248	0	1.10344	1.08888	2.27322	1.45892	1.52038	0	0	0	0	1.53352
lowest non-zero value	1.05455
1/2 lowest non-zero	0.527275
		regulation of protein stability	post-translational protein modification	protein folding	proteasomal protein catabolic process	protein modification by small protein removal	regulation of protein catabolic process	positive regulation of proteolysis	positive regulation of catabolic process	neutrophil mediated immunity	granulocyte activation	tricarboxylic acid metabolic process	toxin transport	regulation of ATPase activity
	NS1	6.3273	2.48826	6.7736	2.85373	1.69866	4.74412	5.83567	7.6019	7.83601	7.89914	2.10119	8.62589	3.06704
	NS2A	2.1091	10.7824	2.90297	7.4197	7.92707	6.32549	8.7535	9.12228	14.1048	14.2185	0.52727	0.52727	1.53352
	NS2B	0.52727	0.52727	0.52727	0.52727	0.52727	0.52727	0.52727	0.52727	0.52727	0.52727	0.52727	0.52727	0.52727
	NS3	5.27275	2.48826	2.90297	3.42448	2.8311	3.95343	5.83567	7.6019	7.83601	7.89914	6.30358	0.52727	6.13408
	NS4A	1.05455	0.829418	1.93531	0.570746	0.52727	0.790686	1.45892	0.52727	0.52727	0.52727	0.52727	0.52727	1.53352
	NS4B	0.52727	1.65884	0.967657	1.14149	0.566219	0.52727	0.52727	0.52727	1.5672	1.57983	0.52727	0.52727	0.52727
	NS5	2.1091	1.65884	0.52727	1.14149	1.13244	2.37206	1.45892	1.52038	0.52727	0.52727	0.52727	0.52727	1.53352
Log2
		regulation of protein stability	post-translational protein modification	protein folding	proteasomal protein catabolic process	protein modification by small protein removal	regulation of protein catabolic process	positive regulation of proteolysis	positive regulation of catabolic process	neutrophil mediated immunity	granulocyte activation	tricarboxylic acid metabolic process	toxin transport	regulation of ATPase activity
	NS1	2.66159	1.31513	2.75992	1.51285	0.764395	2.24614	2.5449	2.92636	2.97012	2.9817	1.07121	3.10867	1.61685
	NS2A	1.07663	3.43061	1.53753	2.89136	2.98679	2.66118	3.12986	3.1894	3.81812	3.82969	-0.923386	-0.923386	0.616846
	NS2B	-0.923386	-0.923386	-0.923386	-0.923386	-0.923386	-0.923386	-0.923386	-0.923386	-0.923386	-0.923386	-0.923386	-0.923386	-0.923386
	NS3	2.39856	1.31513	1.53753	1.77588	1.50136	1.98311	2.5449	2.92636	2.97012	2.9817	2.65617	-0.923386	2.61685
	NS4A	0.0766272	-0.269828	0.952568	-0.809079	-0.923386	-0.338823	0.544898	-0.923386	-0.923386	-0.923386	-0.923386	-0.923386	0.616846
	NS4B	-0.923386	0.730172	-0.0474323	0.190921	-0.820567	-0.923386	-0.923386	-0.923386	0.648191	0.659768	-0.923386	-0.923386	-0.923386
	NS5	1.07663	0.730172	-0.923386	0.190921	0.179433	1.24614	0.544898	0.604433	-0.923386	-0.923386	-0.923386	-0.923386	0.616846

## Sheet: STable 9
Total per Phenotype
		binuclear cell (CMPO:0000213)	abnormal nucleus shape (CMPO:0000157)	abnormal chromosome segregation (CMPO:0000326)	metaphase delayed (CMPO:0000307)	cell death (CMPO:0000030)	mitotic metaphase plate congression (CMPO:0000348)	prometaphase delayed (CMPO:0000344)	increased nucleus size (CMPO:0000140)	increased variability of nuclear shape in population (CMPO:0000345)	mitosis delayed (CMPO:0000202)	graped micronucleus (CMPO:0000156)	increased cell movement speed (CMPO:0000236)	proliferating cells (CMPO:0000241)	Reduction in spontaneous 53BP1 foci	decreased number of site of double-strand break (CMPO:0000181)	Accumulation of GFP-RNF168 on nuclear bodies	decreased duration of mitotic prophase (CMPO:0000329)	increased duration of mitotic prophase (CMPO:0000328)
	Total	5	14	7	5	6	12	3	5	4	9	3	3	1	0	0	13	0	0
	Size	629	814	485	271	778	421	39	310	741	440	154	269	103	2	4	33	21	19
Total per NS
		binuclear cell (CMPO:0000213)	abnormal nucleus shape (CMPO:0000157)	abnormal chromosome segregation (CMPO:0000326)	metaphase delayed (CMPO:0000307)	cell death (CMPO:0000030)	mitotic metaphase plate congression (CMPO:0000348)	prometaphase delayed (CMPO:0000344)	increased nucleus size (CMPO:0000140)	increased variability of nuclear shape in population (CMPO:0000345)	mitosis delayed (CMPO:0000202)	graped micronucleus (CMPO:0000156)	increased cell movement speed (CMPO:0000236)	proliferating cells (CMPO:0000241)	Reduction in spontaneous 53BP1 foci	decreased number of site of double-strand break (CMPO:0000181)	Accumulation of GFP-RNF168 on nuclear bodies	decreased duration of mitotic prophase (CMPO:0000329)	increased duration of mitotic prophase (CMPO:0000328)
	NS1	3	5	2	2	2	4	0	1	1	3	2	0	0	0	0	3	0	0
	NS2A	0	2	1	0	2	1	1	1	1	2	0	1	0	0	0	8	0	0
	NS2B	1	1	1	1	0	1	0	0	0	0	0	0	0	0	0	0	0	0
	NS3	1	5	2	1	2	4	2	1	2	3	1	2	1	0	0	2	0	0
	NS4A	0	0	0	1	0	1	0	2	0	0	0	0	0	0	0	0	0	0
	NS4B	0	0	0	0	0	0	0	0	0	0	0	0	0	0	0	0	0	0
	NS5	0	1	1	0	0	1	0	0	0	1	0	0	0	0	0	0	0	0
Enrichment Ratio
		binuclear cell (CMPO:0000213)	abnormal nucleus shape (CMPO:0000157)	abnormal chromosome segregation (CMPO:0000326)	metaphase delayed (CMPO:0000307)	cell death (CMPO:0000030)	mitotic metaphase plate congression (CMPO:0000348)	prometaphase delayed (CMPO:0000344)	increased nucleus size (CMPO:0000140)	increased variability of nuclear shape in population (CMPO:0000345)	mitosis delayed (CMPO:0000202)	graped micronucleus (CMPO:0000156)	increased cell movement speed (CMPO:0000236)	proliferating cells (CMPO:0000241)	Reduction in spontaneous 53BP1 foci	decreased number of site of double-strand break (CMPO:0000181)	Accumulation of GFP-RNF168 on nuclear bodies	decreased duration of mitotic prophase (CMPO:0000329)	increased duration of mitotic prophase (CMPO:0000328)
	NS1	2.97496	3.83139	2.57216	4.60332	1.60347	5.92637	0	2.0121	0.841768	4.25284	8.10065	0	0	0	0	56.7045	0	0
	NS2A	0	1.75149	1.46981	0	1.83254	1.69325	18.2784	2.29954	0.96202	3.24026	0	2.65003	0	0	0	172.814	0	0
	NS2B	1.58665	1.22604	2.05773	3.68266	0	2.37055	0	0	0	0	0	0	0	0	0	0	0	0
	NS3	0.453327	1.75149	1.17585	1.05219	0.733015	2.7092	14.6227	0.919816	0.769616	1.94416	1.85158	2.12002	2.76838	0	0	17.2814	0	0
	NS4A	0	0	0	4.60332	0	2.96318	0	8.04839	0	0	0	0	0	0	0	0	0	0
	NS4B	0	0	0	0	0	0	0	0	0	0	0	0	0	0	0	0	0	0
	NS5	0	1.16766	1.95974	0	0	2.25766	0	0	0	2.16017	0	0	0	0	0	0	0	0
lowest non-zero value	0.453327
1/2 lowest non-zero	0.226664
		binuclear cell (CMPO:0000213)	abnormal nucleus shape (CMPO:0000157)	abnormal chromosome segregation (CMPO:0000326)	metaphase delayed (CMPO:0000307)	cell death (CMPO:0000030)	mitotic metaphase plate congression (CMPO:0000348)	prometaphase delayed (CMPO:0000344)	increased nucleus size (CMPO:0000140)	increased variability of nuclear shape in population (CMPO:0000345)	mitosis delayed (CMPO:0000202)	graped micronucleus (CMPO:0000156)	increased cell movement speed (CMPO:0000236)	proliferating cells (CMPO:0000241)	Reduction in spontaneous 53BP1 foci	decreased number of site of double-strand break (CMPO:0000181)	Accumulation of GFP-RNF168 on nuclear bodies	decreased duration of mitotic prophase (CMPO:0000329)	increased duration of mitotic prophase (CMPO:0000328)
	NS1	2.97496	3.83139	2.57216	4.60332	1.60347	5.92637	0.226664	2.0121	0.841768	4.25284	8.10065	0.226664	0.226664	0.226664	0.226664	56.7045	0.226664	0.226664
	NS2A	0.226664	1.75149	1.46981	0.226664	1.83254	1.69325	18.2784	2.29954	0.96202	3.24026	0.226664	2.65003	0.226664	0.226664	0.226664	172.814	0.226664	0.226664
	NS2B	1.58665	1.22604	2.05773	3.68266	0.226664	2.37055	0.226664	0.226664	0.226664	0.226664	0.226664	0.226664	0.226664	0.226664	0.226664	0.226664	0.226664	0.226664
	NS3	0.453327	1.75149	1.17585	1.05219	0.733015	2.7092	14.6227	0.919816	0.769616	1.94416	1.85158	2.12002	2.76838	0.226664	0.226664	17.2814	0.226664	0.226664
	NS4A	0.226664	0.226664	0.226664	4.60332	0.226664	2.96318	0.226664	8.04839	0.226664	0.226664	0.226664	0.226664	0.226664	0.226664	0.226664	0.226664	0.226664	0.226664
	NS4B	0.226664	0.226664	0.226664	0.226664	0.226664	0.226664	0.226664	0.226664	0.226664	0.226664	0.226664	0.226664	0.226664	0.226664	0.226664	0.226664	0.226664	0.226664
	NS5	0.226664	1.16766	1.95974	0.226664	0.226664	2.25766	0.226664	0.226664	0.226664	2.16017	0.226664	0.226664	0.226664	0.226664	0.226664	0.226664	0.226664	0.226664
curated
		binuclear cell (CMPO:0000213)	abnormal nucleus shape (CMPO:0000157)	abnormal chromosome segregation (CMPO:0000326)	metaphase delayed (CMPO:0000307)	cell death (CMPO:0000030)	mitotic metaphase plate congression (CMPO:0000348)	prometaphase delayed (CMPO:0000344)	increased nucleus size (CMPO:0000140)	increased variability of nuclear shape in population (CMPO:0000345)	mitosis delayed (CMPO:0000202)	graped micronucleus (CMPO:0000156)	increased cell movement speed (CMPO:0000236)	proliferating cells (CMPO:0000241)	Accumulation of GFP-RNF168 on nuclear bodies
	NS1	2.97496	3.83139	2.57216	4.60332	1.60347	5.92637	0.226664	2.0121	0.841768	4.25284	8.10065	0.226664	0.226664	56.7045
	NS2A	0.226664	1.75149	1.46981	0.226664	1.83254	1.69325	18.2784	2.29954	0.96202	3.24026	0.226664	2.65003	0.226664	172.814
	NS2B	1.58665	1.22604	2.05773	3.68266	0.226664	2.37055	0.226664	0.226664	0.226664	0.226664	0.226664	0.226664	0.226664	0.226664
	NS3	0.453327	1.75149	1.17585	1.05219	0.733015	2.7092	14.6227	0.919816	0.769616	1.94416	1.85158	2.12002	2.76838	17.2814
	NS4A	0.226664	0.226664	0.226664	4.60332	0.226664	2.96318	0.226664	8.04839	0.226664	0.226664	0.226664	0.226664	0.226664	0.226664
	NS4B	0.226664	0.226664	0.226664	0.226664	0.226664	0.226664	0.226664	0.226664	0.226664	0.226664	0.226664	0.226664	0.226664	0.226664
	NS5	0.226664	1.16766	1.95974	0.226664	0.226664	2.25766	0.226664	0.226664	0.226664	2.16017	0.226664	0.226664	0.226664	0.226664
log2
		binuclear cell (CMPO:0000213)	abnormal nucleus shape (CMPO:0000157)	abnormal chromosome segregation (CMPO:0000326)	metaphase delayed (CMPO:0000307)	cell death (CMPO:0000030)	mitotic metaphase plate congression (CMPO:0000348)	prometaphase delayed (CMPO:0000344)	increased nucleus size (CMPO:0000140)	increased variability of nuclear shape in population (CMPO:0000345)	mitosis delayed (CMPO:0000202)	graped micronucleus (CMPO:0000156)	increased cell movement speed (CMPO:0000236)	proliferating cells (CMPO:0000241)	Accumulation of GFP-RNF168 on nuclear bodies
	NS1	1.57287	1.93787	1.36298	2.20268	0.681198	2.56715	-2.14138	1.0087	-0.248506	2.08843	3.01804	-2.14138	-2.14138	5.82539
	NS2A	-2.14138	0.808584	0.555628	-2.14138	0.873843	0.759793	4.19207	1.20134	-0.0558606	1.69611	-2.14138	1.40601	-2.14138	7.43308
	NS2B	0.66598	0.294011	1.04106	1.88075	-2.14138	1.24522	-2.14138	-2.14138	-2.14138	-2.14138	-2.14138	-2.14138	-2.14138	-2.14138
	NS3	-1.14138	0.808584	0.2337	0.073392	-0.448085	1.43786	3.87014	-0.120583	-0.377789	0.959144	0.888755	1.08408	1.46904	4.11115
	NS4A	-2.14138	-2.14138	-2.14138	2.20268	-2.14138	1.56715	-2.14138	3.0087	-2.14138	-2.14138	-2.14138	-2.14138	-2.14138	-2.14138
	NS4B	-2.14138	-2.14138	-2.14138	-2.14138	-2.14138	-2.14138	-2.14138	-2.14138	-2.14138	-2.14138	-2.14138	-2.14138	-2.14138	-2.14138
	NS5	-2.14138	0.223622	0.970666	-2.14138	-2.14138	1.17483	-2.14138	-2.14138	-2.14138	1.11115	-2.14138	-2.14138	-2.14138	-2.14138

## Sheet: STable 10
	binuclear cell (CMPO:0000213)	abnormal nucleus shape (CMPO:0000157)	abnormal chromosome segregation (CMPO:0000326)	metaphase delayed (CMPO:0000307)	cell death (CMPO:0000030)	mitotic metaphase plate congression (CMPO:0000348)	prometaphase delayed (CMPO:0000344)	increased nucleus size (CMPO:0000140)	increased variability of nuclear shape in population (CMPO:0000345)	mitosis delayed (CMPO:0000202)	graped micronucleus (CMPO:0000156)	increased cell movement speed (CMPO:0000236)	proliferating cells (CMPO:0000241)	Accumulation of GFP-RNF168 on nuclear bodies
EFTUD2	1	1	0	0	0	1	0	0	0	1	1	0	0	0
CEP192	0	1	1	0	0	1	0	0	0	1	1	0	0	0
CCT8	0	1	0	1	0	1	0	0	0	1	0	0	0	0
PHPT1	1	1	1	0	0	0	0	0	1	0	0	0	0	0
PSMD6	0	1	0	0	0	0	1	0	0	1	0	0	0	1
PAPSS1	0	1	0	0	1	1	0	0	0	1	0	0	0	0
FAM184A	0	1	1	0	0	1	0	0	0	1	0	0	0	0
LSM2	1	0	0	0	0	0	0	0	0	1	1	0	0	0
SELENOP	0	1	1	0	0	1	0	0	0	0	0	0	0	0
BAG6	0	1	1	0	0	1	0	0	0	0	0	0	0	0
PSMA6	0	0	0	0	1	0	0	0	1	1	0	0	0	0
KIF4A	1	1	1	0	0	0	0	0	0	0	0	0	0	0
ZNF155	0	1	1	0	0	1	0	0	0	0	0	0	0	0
PPP2R1A	0	0	0	1	0	1	0	0	0	0	0	0	0	0
PSMD11	0	0	0	0	1	0	0	0	0	0	0	0	0	1
INIP	0	0	0	1	0	1	0	0	0	0	0	0	0	0
SUMO1	0	0	0	0	0	0	1	0	1	0	0	0	0	0
DNAJC7	0	0	0	0	0	0	0	1	0	0	0	0	0	0
PSMD2	0	0	0	0	0	0	0	0	0	0	0	0	0	1
ARIH2	0	0	0	0	1	0	0	0	0	0	0	0	0	0
FBLN5	0	1	0	0	0	0	0	0	0	0	0	0	0	0
RACK1	0	0	0	0	0	0	0	0	0	0	0	0	0	1
LRPPRC	0	0	0	0	0	0	0	0	0	0	0	1	0	0
PSMB5	0	0	0	0	0	0	0	0	0	0	0	0	0	1
PSMC1	0	0	0	0	0	0	0	0	0	0	0	0	0	1
PSMC4	0	0	0	0	0	0	0	0	0	0	0	0	0	1
PSMC5	0	0	0	0	0	0	0	0	0	0	0	0	0	1
PSMD12	0	0	0	0	0	0	0	0	0	0	0	0	0	1
SUGT1	0	0	0	0	1	0	0	0	0	0	0	0	0	0
DYNC1I2	0	0	0	0	0	0	0	0	1	0	0	0	0	0
GNPTAB	1	0	0	0	0	0	0	0	0	0	0	0	0	0
ZBTB38	0	0	0	0	0	0	0	0	0	0	0	0	1	0
ZNF251	0	0	0	0	0	0	0	0	0	0	0	1	0	0
NVL	0	0	0	0	0	0	0	1	0	0	0	0	0	0

[truncated: 6 more sheets: STable 11, STable 12, STable 13, STable 14, Comments, Sheet1]
