# Supplementary material for: Network of Interactions between ZIKA Virus Non-structural Proteins and Human Host Proteins
Source: Preprints.org preprint supplement (doi:10.20944/preprints201909.0078.v1), 2019-09-07
Supplement: Supplementary file 2 [file supplementary]

Archive with 2 entries (2 files):
- Supplementary Tables ZIKV (Monteiro).xlsx
- ZIKV PPI (Golubeva et al.) Supplementary Figures.pdf
